# Supplementary material for: Photoinitiated synthesis of polymer brush from dendritic photoinitiator electrostatic self-assembly
Source: Royal Society of Chemistry journal article supplement (doi:10.1039/b510430k), 2005-01-01
Supplement: b510430k.pdf [file b510430k.pdf]

## Supplementary Material

### Photoinitiated synthesis of polymer brush from dendritic photoinitiator electrostatic self-assembly

*Xuesong JIANG, Jie YIN\**

Research Institute of Polymer Materials, School of Chemistry & Chemical Technology,  
State Key Laboratory for Composite Materials, Shanghai Jiao Tong University,  
Shanghai 200240, People's Republic of China  
Tel.: +86-21-54746215; Fax: +86-21-54747445, E-mail: [jyin@sjtu.edu.cn](mailto:jyin@sjtu.edu.cn)

#### **Materials.**

Methyl methacrylate (MMA) was washed with 5% aqueous NaOH solution, dried over anhydrous Na<sub>2</sub>CO<sub>3</sub> and distilled. Water used in the experiment is Milli-Q deionized water (18 MΩ). Quartz slides (bought from Chinese Medicine Group) were used as substrates for film deposition. Substrates were prepared by immersion in a 30:70 H<sub>2</sub>O<sub>2</sub> (30%)/H<sub>2</sub>SO<sub>4</sub> (98%) mixture for 1 h at 80 °C (piranha etch). Following this treatment, substrates were rinsed in the water to wash any remaining etch solution off, then immersed in a hot H<sub>2</sub>O-H<sub>2</sub>O<sub>2</sub>-NH<sub>3</sub> (5:1:1) mixture at 60 °C for 1 h. Afterwards, the substrates were carefully store in water.

#### **DAB-64-TX layer by electrostatic self-assembly**

The quartz slides were immersed for 2h in a  $1 \times 10^{-3}$  mol\*L<sup>-1</sup> DAB-64-TX aqueous solution at room temperature to adsorb DAB-64-TX layer on the both sides of the surface, then the quartz slides were rinsed with water three times. Afterwards, the

quartz slides were dried with a stream of N<sub>2</sub> for photoinitiated polymerization of MMA.

### **Polymer brush by photoinitiated polymerization of MMA**

The quartz slides were immersed in MMA/toluene (v/v is 1:1) in a tube, which is placed in a thermostatic bath to maintain 30°. The tube was irradiated for 12h by a 400W high-pressure Hg lamp, set at a distance of 40cm from the sample. After the reaction, the substrates were rinsed with toluene and then extracted with a water-cooled Soxhlet extractor by using toluene as solvent for 12h to completely remove the residual physisorbed polymer. Then the substrates were dried with a stream of N<sub>2</sub>.

### **Analysis**

**Ellipsometry** □ The film thickness was obtained with an V-Vase (USA. J. A. Woollam) imaging ellipsometer.

**UV-vis spectra** □ UV-vis spectra were recorded by Perkin-Elmer Lambda 20 UV-vis spectrophotometer.

**AFM** □ The surface morphologies of samples were acquired in tap mode on AFM (Nanoscope □, Digital instruments, USA).

**XPS:** XPS experiments were carried out on a PHI-5000C ESCA system (Perkin Elmer) with Al Ka radiation ( $h\nu=1486.6$  eV). In general, the X-ray anode was run at 250W and the high voltage was kept at 14.0 kV with a detection angle at 54°. The pass energy was fixed at 46.95 eV to ensure sufficient sensitivity. The base pressure of the analyzer

chamber was about  $5 \times 10^{-8}$  Pa. The sample was directly pressed to a self-supported disk (10×10mm) and mounted on a sample holder then transferred into the analyzer chamber. The whole spectra (0~1200eV) and the narrow spectra of all the elements with much high resolution were both recorded. Binding energies were calibrated by using the containment carbon (C1s = 284.6eV).

**GPC:** Molecular weights were determined by gel permeation chromatography (GPC) on a Perkin Elmer Series 200 apparatus on the basis of linear polystyrene standards using THF as eluent.
